# Supplementary material for: H3K27 modifications define segmental regulatory domains in the Drosophila bithorax complex
Source: eLife journal article supplement (doi:10.7554/elife.02833), 2014-07-31
Supplement: supp [file elife-02833-supp-v1.zip]

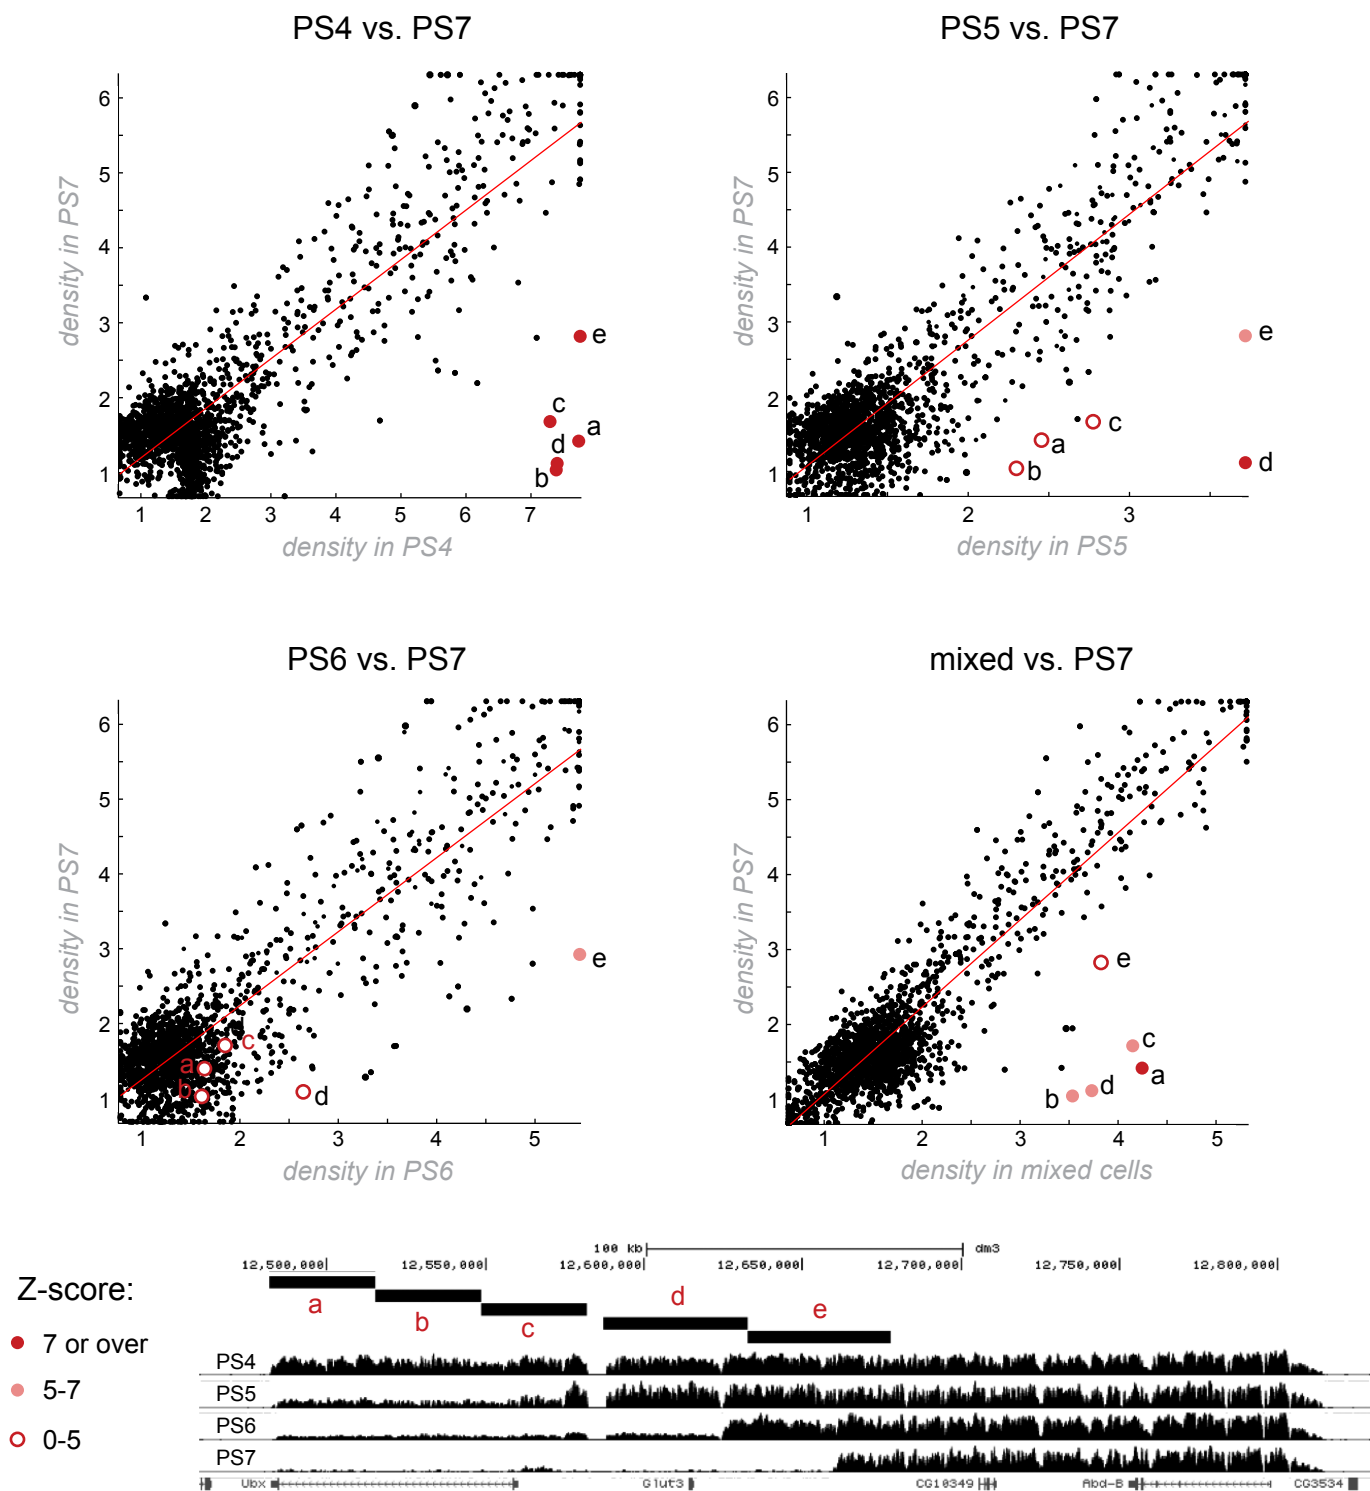

**Fig. 2, S1:** Genome-wide comparisons of H3K27me3 patterns. The most striking differences in H3K27me3 enrichment across different parasegments occur at the BX-C. Each plot compares the density of H3K27me3 between two parasegments over all H3K27me3 peaks (see supplementary methods for additional details). A linear line of fit was drawn. H3K27me3 density across the entire genome was largely unchanged between parasegments, with the exception of a few points corresponding to the BX-C that are markedly far off from the line of fit. Within each plot, the comparison of five BX-C segments (labeled a-e) are indicated with pink or red circles, the color of which corresponds to the Z-score (number of observed standard deviations from the line of fit).
