# Supplementary material for: H3K27 modifications define segmental regulatory domains in the Drosophila bithorax complex
Source: eLife journal article supplement (doi:10.7554/elife.02833), 2014-07-31
Supplement: supp [file elife-02833-supp-v1.zip]

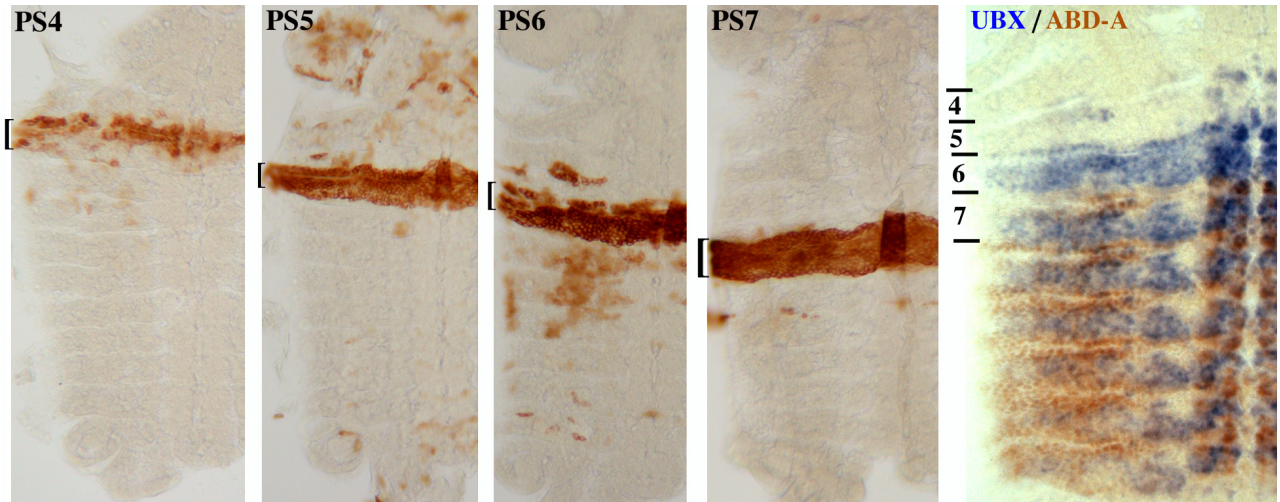

**Figure 1 -- figure supplement 2:** close-up of parasegment specific expression patterns. Embryos expressing the INTACT marker in parasegments 4-7 were obtained as in Fig. 1B. All are at ~10h of development, prior to dorsal closure; they were dissected along the dorsal midline, and flattened to display the epidermis in one focal plane. The last panel shows an embryo stained for UBX (in blue) and ABD-A (in brown)(Karch et al., 1990), to illustrate the expression patterns of these two proteins in parasegments 4-7.
