# Supplementary material for: H3K27 modifications define segmental regulatory domains in the Drosophila bithorax complex
Source: eLife journal article supplement (doi:10.7554/elife.02833), 2014-07-31
Supplement: supp [file elife-02833-supp-v1.zip]

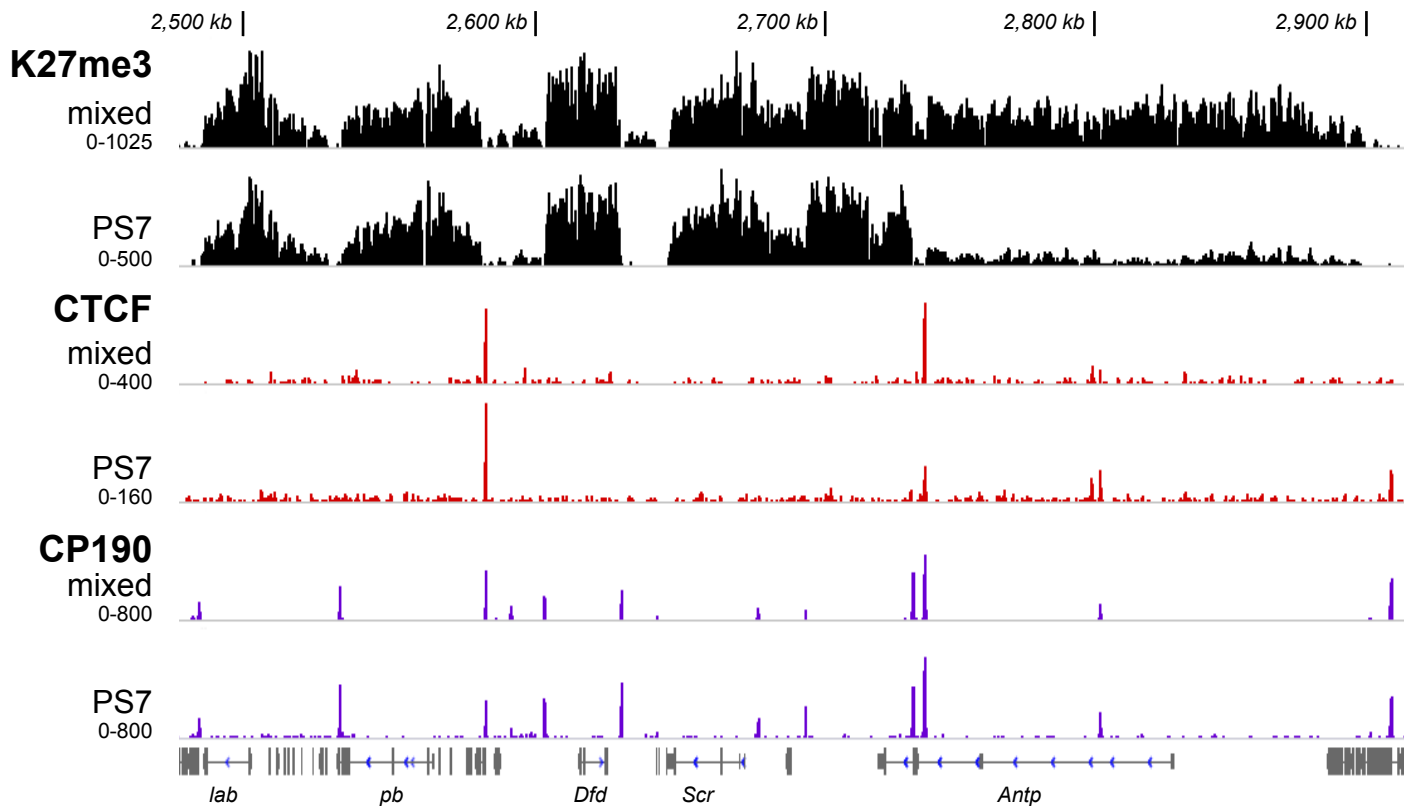

**Figure 2, Figure Supplement 2.** H3K27me3, CTCF, and CP190 profiles in PS7 for the Antennapedia complex, illustrated as in Fig. 2. The H3K27me3 profiles in parasegments 4 through 7 are very similar. ANTP is expressed at high levels in PS4 and PS5 in wild type embryos, and in the absence of the BX-C, parasegments 4-12 all show similar expression patterns (Carroll et al., 1986). By this criterion, *Antp* appears to be free of PcG repression in PS4-12, which is consistent with the lack of H3K27 methylation over its transcription unit in PS7, as shown. CTCF and CP190 profiles look identical between mixed and PS7 nuclei, as they are in the BX-C. CP190 marks several potential domain boundaries in the Antennapedia complex that lack apparent CTCF binding.
